# Supplementary material
Source: publisher figshare collection journal article supplement (https://acs.figshare.com/ndownloader/files/5176048)
Supplement: Supplementary file 1 [file 5176048]

 
data_ar29 
 
_audit_creation_method            SHELXL-97 
_chemical_name_systematic 
; 
 ? 
; 
_chemical_name_common             Ge5[Jeff*]4.3toluene
_chemical_melting_point           ? 
_chemical_formula_moiety          ? 
_chemical_formula_sum 
 'C117 H124 Ge5' 
_chemical_formula_weight          1893.11 
 
loop_ 
 _atom_type_symbol 
 _atom_type_description 
 _atom_type_scat_dispersion_real 
 _atom_type_scat_dispersion_imag 
 _atom_type_scat_source 
 'C'  'C'   0.0033   0.0016 
 'International Tables Vol C Tables 4.2.6.8 and 6.1.1.4' 
 'H'  'H'   0.0000   0.0000 
 'International Tables Vol C Tables 4.2.6.8 and 6.1.1.4' 
 'Ge'  'Ge'   0.1547   1.8001 
 'International Tables Vol C Tables 4.2.6.8 and 6.1.1.4' 
 
_symmetry_cell_setting            orthorhombic 
_symmetry_space_group_name_H-M    'P c c n'
 
loop_ 
 _symmetry_equiv_pos_as_xyz 
 'x, y, z' 
 '-x+1/2, -y+1/2, z' 
 'x+1/2, -y, -z+1/2' 
 '-x, y+1/2, -z+1/2' 
 '-x, -y, -z' 
 'x-1/2, y-1/2, -z' 
 '-x-1/2, y, z-1/2' 
 'x, -y-1/2, z-1/2' 
 
_cell_length_a                    14.6845(16) 
_cell_length_b                    23.524(3) 
_cell_length_c                    27.959(3) 
_cell_angle_alpha                 90.00 
_cell_angle_beta                  90.00 
_cell_angle_gamma                 90.00 
_cell_volume                      9658.1(19) 
_cell_formula_units_Z             4 
_cell_measurement_temperature     91(2) 
_cell_measurement_reflns_used     861
_cell_measurement_theta_min       2.292
_cell_measurement_theta_max       31.350
 
_exptl_crystal_description        block 
_exptl_crystal_colour             'dark teal' 
_exptl_crystal_size_max           0.24 
_exptl_crystal_size_mid           0.15 
_exptl_crystal_size_min           0.13 
_exptl_crystal_density_meas       ? 
_exptl_crystal_density_diffrn     1.302 
_exptl_crystal_density_method     'not measured' 
_exptl_crystal_F_000              3944 
_exptl_absorpt_coefficient_mu     1.587 
_exptl_absorpt_correction_type    multi-scan 
_exptl_absorpt_correction_T_min   0.7019 
_exptl_absorpt_correction_T_max   0.8202 
_exptl_absorpt_process_details    'SADABS 2.04 (Bruker 2002)' 
 
_exptl_special_details 
; 
 ? 
; 
 
_diffrn_ambient_temperature       91(2) 
_diffrn_radiation_wavelength      0.71073 
_diffrn_radiation_type            MoK\a 
_diffrn_radiation_source          'normal-focus sealed tube' 
_diffrn_radiation_monochromator   graphite 
_diffrn_measurement_device_type   'Bruker SMART 1000' 
_diffrn_measurement_method        \w 
_diffrn_detector_area_resol_mean  8.3 
_diffrn_standards_number          '50 frames remeasured' 
_diffrn_standards_interval_count  ? 
_diffrn_standards_interval_time   ? 
_diffrn_standards_decay_%         <0.1 
_diffrn_reflns_number             60399 
_diffrn_reflns_av_R_equivalents   0.1132 
_diffrn_reflns_av_sigmaI/netI     0.0871 
_diffrn_reflns_limit_h_min        -16 
_diffrn_reflns_limit_h_max        17 
_diffrn_reflns_limit_k_min        -26 
_diffrn_reflns_limit_k_max        27 
_diffrn_reflns_limit_l_min        -33 
_diffrn_reflns_limit_l_max        33 
_diffrn_reflns_theta_min          1.63 
_diffrn_reflns_theta_max          25.25 
_reflns_number_total              8590 
_reflns_number_gt                 5513 
_reflns_threshold_expression      I>2\s(I) 
 
_computing_data_collection        'Bruker SMART 5.054 (Bruker 2001)'
_computing_cell_refinement        'Bruker SAINT 6.35A (Bruker 2002)'
_computing_data_reduction         'Bruker SAINT 6.35A (Bruker 2002)'
_computing_structure_solution     'SHELXS-97 (Sheldrick, 1990)'
_computing_structure_refinement   'SHELXL-97 (Sheldrick, 1997)'
_computing_molecular_graphics     'SHELXTL 5, XP (Sheldrick, 1994)'
_computing_publication_material   'SHELXL-97 (Sheldrick, 1997)'
 
_refine_special_details 
; 
 Refinement of F^2^ against ALL reflections.  The weighted R-factor wR and 
 goodness of fit S are based on F^2^, conventional R-factors R are based 
 on F, with F set to zero for negative F^2^. The threshold expression of 
 F^2^ > 2sigma(F^2^) is used only for calculating R-factors(gt) etc. and is 
 not relevant to the choice of reflections for refinement.  R-factors based 
 on F^2^ are statistically about twice as large as those based on F, and R- 
 factors based on ALL data will be even larger.
 The central five-Ge cluster is disordered with respect to a 2-fold axis
 parallel to c which generates the complete molecule. Consequently, all
 Ge atoms were refined at half-occupancy. There is one ordered toluene and
 another toluene disordered with respect to a center of inversion. The latter
 atoms (C56 through C62) were refined as a rigid group with isotropic thermal
 parameters and geometry based on the geometry of the ordered group. 
; 
 
_refine_ls_structure_factor_coef  Fsqd  
_refine_ls_matrix_type            full 
_refine_ls_weighting_scheme       calc  
_refine_ls_weighting_details 
 'calc w=1/[\s^2^(Fo^2^)+(0.0907P)^2^+32.5064P] where P=(Fo^2^+2Fc^2^)/3' 
_atom_sites_solution_primary      direct 
_atom_sites_solution_secondary    difmap 
_atom_sites_solution_hydrogens    geom 
_refine_ls_hydrogen_treatment     constr
_refine_ls_extinction_method      SHELXL 
_refine_ls_extinction_coef        0.0051(4) 
_refine_ls_extinction_expression 
 'Fc^*^=kFc[1+0.001xFc^2^\l^3^/sin(2\q)]^-1/4^' 
_refine_ls_number_reflns          8590 
_refine_ls_number_parameters      568 
_refine_ls_number_restraints      0 
_refine_ls_R_factor_all           0.1229 
_refine_ls_R_factor_gt            0.0752 
_refine_ls_wR_factor_ref          0.2175 
_refine_ls_wR_factor_gt           0.1814 
_refine_ls_goodness_of_fit_ref    1.041 
_refine_ls_restrained_S_all       1.041 
_refine_ls_shift/su_max           0.001 
_refine_ls_shift/su_mean          0.000 
 
loop_ 
 _atom_site_label 
 _atom_site_type_symbol 
 _atom_site_fract_x 
 _atom_site_fract_y 
 _atom_site_fract_z 
 _atom_site_U_iso_or_equiv 
 _atom_site_adp_type 
 _atom_site_occupancy 
 _atom_site_symmetry_multiplicity 
 _atom_site_calc_flag 
 _atom_site_refinement_flags 
 _atom_site_disorder_assembly 
 _atom_site_disorder_group 
Ge1 Ge 0.17896(16) 0.21881(10) 0.32463(9) 0.0267(5) Uani 0.50 1 d P A -1 
Ge2 Ge 0.20800(12) 0.18914(8) 0.23194(6) 0.0286(4) Uani 0.50 1 d P A -1 
Ge3 Ge 0.31165(12) 0.28568(8) 0.23509(6) 0.0279(4) Uani 0.50 1 d P . -1 
Ge4 Ge 0.34829(17) 0.26456(10) 0.32829(10) 0.0291(5) Uani 0.50 1 d P . -1 
Ge5 Ge 0.15575(7) 0.31815(5) 0.27830(4) 0.0248(3) Uani 0.50 1 d P A -1 
C1 C 0.1522(5) 0.1702(3) 0.3839(3) 0.0501(18) Uani 1 1 d . . . 
C2 C 0.1978(5) 0.1168(3) 0.3860(3) 0.0479(17) Uani 1 1 d . A . 
C3 C 0.2005(5) 0.0867(3) 0.4292(3) 0.0513(18) Uani 1 1 d . . . 
H3 H 0.2323 0.0515 0.4306 0.062 Uiso 1 1 calc R A . 
C4 C 0.1580(5) 0.1071(3) 0.4699(3) 0.058(2) Uani 1 1 d . A . 
H4 H 0.1617 0.0869 0.4993 0.069 Uiso 1 1 calc R . . 
C5 C 0.1094(5) 0.1580(3) 0.4670(3) 0.0519(18) Uani 1 1 d . . . 
H5 H 0.0785 0.1717 0.4945 0.062 Uiso 1 1 calc R A . 
C6 C 0.1050(5) 0.1889(3) 0.4249(3) 0.0481(17) Uani 1 1 d . A . 
C7 C 0.0398(4) 0.2373(3) 0.4267(2) 0.0447(16) Uani 1 1 d . . . 
C8 C 0.0585(5) 0.2866(3) 0.4531(2) 0.0456(16) Uani 1 1 d . A . 
C9 C -0.0103(4) 0.3264(3) 0.4613(2) 0.0465(16) Uani 1 1 d . . . 
H9 H 0.0036 0.3598 0.4790 0.056 Uiso 1 1 calc R A . 
C10 C -0.0968(4) 0.3189(3) 0.4446(3) 0.0474(17) Uani 1 1 d . A . 
C11 C -0.1153(5) 0.2699(3) 0.4182(3) 0.0521(18) Uani 1 1 d . . . 
H11 H -0.1749 0.2643 0.4058 0.063 Uiso 1 1 calc R A . 
C12 C -0.0492(5) 0.2291(3) 0.4095(3) 0.0477(17) Uani 1 1 d . A . 
C13 C 0.2394(4) 0.0864(3) 0.3445(2) 0.0420(16) Uani 1 1 d . . . 
C14 C 0.1831(4) 0.0560(3) 0.3133(3) 0.0470(17) Uani 1 1 d . A . 
C15 C 0.2235(5) 0.0210(3) 0.2787(3) 0.0507(18) Uani 1 1 d . . . 
H15 H 0.1853 0.0012 0.2569 0.061 Uiso 1 1 calc R A . 
C16 C 0.3157(5) 0.0142(3) 0.2751(3) 0.0517(18) Uani 1 1 d . A . 
C17 C 0.3701(5) 0.0437(3) 0.3061(3) 0.059(2) Uani 1 1 d . . . 
H17 H 0.4343 0.0403 0.3031 0.071 Uiso 1 1 calc R A . 
C18 C 0.3345(5) 0.0790(3) 0.3423(3) 0.0544(19) Uani 1 1 d . A . 
C19 C 0.0818(5) 0.0587(4) 0.3182(3) 0.063(2) Uani 1 1 d . . . 
H19A H 0.0651 0.0536 0.3519 0.095 Uiso 1 1 calc R A . 
H19B H 0.0541 0.0284 0.2990 0.095 Uiso 1 1 calc R . . 
H19C H 0.0599 0.0957 0.3070 0.095 Uiso 1 1 calc R . . 
C20 C 0.3576(5) -0.0243(4) 0.2383(3) 0.065(2) Uani 1 1 d . . . 
H20A H 0.3114 -0.0506 0.2262 0.097 Uiso 1 1 calc R A . 
H20B H 0.4075 -0.0459 0.2529 0.097 Uiso 1 1 calc R . . 
H20C H 0.3814 -0.0014 0.2118 0.097 Uiso 1 1 calc R . . 
C21 C 0.3973(5) 0.1075(4) 0.3771(3) 0.073(3) Uani 1 1 d . . . 
H21A H 0.3775 0.1468 0.3821 0.109 Uiso 1 1 calc R A . 
H21B H 0.4594 0.1073 0.3642 0.109 Uiso 1 1 calc R . . 
H21C H 0.3961 0.0870 0.4076 0.109 Uiso 1 1 calc R . . 
C22 C 0.1532(4) 0.2965(3) 0.4729(3) 0.0503(18) Uani 1 1 d . . . 
H22A H 0.1980 0.2921 0.4472 0.075 Uiso 1 1 calc R A . 
H22B H 0.1657 0.2686 0.4981 0.075 Uiso 1 1 calc R . . 
H22C H 0.1572 0.3349 0.4861 0.075 Uiso 1 1 calc R . . 
C23 C -0.1707(5) 0.3628(4) 0.4531(3) 0.062(2) Uani 1 1 d . . . 
H23A H -0.1518 0.3993 0.4395 0.093 Uiso 1 1 calc R A . 
H23B H -0.1808 0.3671 0.4876 0.093 Uiso 1 1 calc R . . 
H23C H -0.2272 0.3503 0.4378 0.093 Uiso 1 1 calc R . . 
C24 C -0.0734(5) 0.1750(3) 0.3842(3) 0.060(2) Uani 1 1 d . . . 
H24A H -0.1383 0.1753 0.3761 0.090 Uiso 1 1 calc R A . 
H24B H -0.0603 0.1425 0.4050 0.090 Uiso 1 1 calc R . . 
H24C H -0.0373 0.1718 0.3548 0.090 Uiso 1 1 calc R . . 
C25 C 0.1036(5) 0.2028(3) 0.1774(3) 0.0481(17) Uani 1 1 d . . . 
C26 C 0.0266(5) 0.2392(3) 0.1752(2) 0.0451(16) Uani 1 1 d . A . 
C27 C -0.0219(5) 0.2432(3) 0.1318(3) 0.0518(18) Uani 1 1 d . . . 
H27 H -0.0736 0.2674 0.1303 0.062 Uiso 1 1 calc R A . 
C28 C 0.0029(5) 0.2133(3) 0.0914(3) 0.0552(19) Uani 1 1 d . A . 
H28 H -0.0287 0.2184 0.0621 0.066 Uiso 1 1 calc R . . 
C29 C 0.0743(5) 0.1762(3) 0.0948(3) 0.0516(18) Uani 1 1 d . . . 
H29 H 0.0902 0.1540 0.0677 0.062 Uiso 1 1 calc R A . 
C30 C 0.1244(5) 0.1699(3) 0.1369(3) 0.0488(17) Uani 1 1 d . A . 
C31 C 0.1929(4) 0.1216(3) 0.1349(3) 0.0451(16) Uani 1 1 d . . . 
C32 C 0.2735(4) 0.1260(3) 0.1097(2) 0.0436(16) Uani 1 1 d . A . 
C33 C 0.3253(5) 0.0778(3) 0.1011(3) 0.0454(16) Uani 1 1 d . . . 
H33 H 0.3816 0.0815 0.0847 0.055 Uiso 1 1 calc R A . 
C34 C 0.2971(5) 0.0244(3) 0.1157(3) 0.0480(17) Uani 1 1 d . A . 
C35 C 0.2166(5) 0.0205(3) 0.1417(3) 0.0517(18) Uani 1 1 d . . . 
H35 H 0.1968 -0.0156 0.1528 0.062 Uiso 1 1 calc R A . 
C36 C 0.1644(5) 0.0684(3) 0.1518(3) 0.0512(18) Uani 1 1 d . A . 
C37 C -0.0159(5) 0.2709(3) 0.2152(3) 0.0463(17) Uani 1 1 d . . . 
C38 C -0.0157(5) 0.3308(3) 0.2167(3) 0.057(2) Uani 1 1 d . A . 
C39 C -0.0647(5) 0.3589(3) 0.2515(3) 0.0539(19) Uani 1 1 d . . . 
H39 H -0.0631 0.3993 0.2524 0.065 Uiso 1 1 calc R A . 
C40 C -0.1162(5) 0.3300(3) 0.2851(3) 0.0493(17) Uani 1 1 d . A . 
C41 C -0.1164(5) 0.2719(3) 0.2829(3) 0.0465(17) Uani 1 1 d . . . 
H41 H -0.1514 0.2515 0.3058 0.056 Uiso 1 1 calc R A . 
C42 C -0.0681(4) 0.2411(3) 0.2491(2) 0.0446(16) Uani 1 1 d . A . 
C43 C -0.0761(6) 0.1780(3) 0.2468(3) 0.060(2) Uani 1 1 d . . . 
H43A H -0.1234 0.1653 0.2691 0.091 Uiso 1 1 calc R A . 
H43B H -0.0177 0.1607 0.2556 0.091 Uiso 1 1 calc R . . 
H43C H -0.0925 0.1666 0.2142 0.091 Uiso 1 1 calc R . . 
C44 C -0.1697(6) 0.3623(3) 0.3217(3) 0.065(2) Uani 1 1 d . . . 
H44A H -0.2064 0.3357 0.3406 0.097 Uiso 1 1 calc R A . 
H44B H -0.2099 0.3895 0.3057 0.097 Uiso 1 1 calc R . . 
H44C H -0.1278 0.3828 0.3429 0.097 Uiso 1 1 calc R . . 
C45 C 0.0389(6) 0.3649(3) 0.1801(3) 0.075(3) Uani 1 1 d . . . 
H45A H 0.0422 0.4047 0.1903 0.112 Uiso 1 1 calc R A . 
H45B H 0.0090 0.3626 0.1488 0.112 Uiso 1 1 calc R . . 
H45C H 0.1006 0.3492 0.1777 0.112 Uiso 1 1 calc R . . 
C46 C 0.3062(5) 0.1829(3) 0.0914(3) 0.0512(18) Uani 1 1 d . . . 
H46A H 0.3682 0.1790 0.0789 0.077 Uiso 1 1 calc R A . 
H46B H 0.3058 0.2105 0.1176 0.077 Uiso 1 1 calc R . . 
H46C H 0.2657 0.1960 0.0658 0.077 Uiso 1 1 calc R . . 
C47 C 0.3509(6) -0.0281(3) 0.1038(3) 0.061(2) Uani 1 1 d . . . 
H47A H 0.3321 -0.0593 0.1248 0.092 Uiso 1 1 calc R A . 
H47B H 0.4160 -0.0205 0.1083 0.092 Uiso 1 1 calc R . . 
H47C H 0.3398 -0.0387 0.0704 0.092 Uiso 1 1 calc R . . 
C48 C 0.0760(5) 0.0609(3) 0.1787(3) 0.062(2) Uani 1 1 d . . . 
H48A H 0.0656 0.0203 0.1848 0.093 Uiso 1 1 calc R A . 
H48B H 0.0257 0.0761 0.1595 0.093 Uiso 1 1 calc R . . 
H48C H 0.0793 0.0813 0.2092 0.093 Uiso 1 1 calc R . . 
C49 C 0.2595(9) -0.1364(7) 0.3521(4) 0.141(5) Uani 1 1 d . . . 
H49A H 0.2850 -0.1010 0.3393 0.211 Uiso 1 1 calc R . . 
H49B H 0.2227 -0.1550 0.3274 0.211 Uiso 1 1 calc R . . 
H49C H 0.3091 -0.1618 0.3618 0.211 Uiso 1 1 calc R . . 
C50 C 0.2000(6) -0.1231(4) 0.3951(4) 0.077(3) Uani 1 1 d . . . 
C51 C 0.1608(7) -0.0715(5) 0.3989(4) 0.095(3) Uani 1 1 d . . . 
H51 H 0.1724 -0.0439 0.3748 0.114 Uiso 1 1 calc R . . 
C52 C 0.1045(7) -0.0575(5) 0.4363(5) 0.100(3) Uani 1 1 d . . . 
H52 H 0.0791 -0.0204 0.4377 0.120 Uiso 1 1 calc R . . 
C53 C 0.0843(7) -0.0955(5) 0.4711(4) 0.088(3) Uani 1 1 d . . . 
H53 H 0.0444 -0.0854 0.4965 0.105 Uiso 1 1 calc R . . 
C54 C 0.1223(7) -0.1486(5) 0.4694(4) 0.083(3) Uani 1 1 d . . . 
H54 H 0.1086 -0.1755 0.4936 0.099 Uiso 1 1 calc R . . 
C55 C 0.1819(8) -0.1634(5) 0.4316(4) 0.094(3) Uani 1 1 d . . . 
H55A H 0.2094 -0.1999 0.4307 0.112 Uiso 1 1 calc R . . 
C56 C 0.3970(9) -0.0442(7) 0.4367(5) 0.138(10) Uiso 0.50 1 d PG B -1 
H56A H 0.4291 -0.0615 0.4097 0.207 Uiso 0.50 1 calc PR B -1 
H56B H 0.3573 -0.0137 0.4251 0.207 Uiso 0.50 1 calc PR B -1 
H56C H 0.3602 -0.0732 0.4529 0.207 Uiso 0.50 1 calc PR B -1 
C57 C 0.4654(6) -0.0200(5) 0.4714(3) 0.080(5) Uiso 0.50 1 d PG B -1 
C58 C 0.4350(5) 0.0057(5) 0.5114(4) 0.080(5) Uiso 0.50 1 d PG B -1 
H58 H 0.3712 0.0087 0.5166 0.095 Uiso 0.50 1 calc PR B -1 
C59 C 0.4943(8) 0.0281(5) 0.5453(3) 0.071(5) Uiso 0.50 1 d PG B -1 
H59 H 0.4704 0.0467 0.5727 0.085 Uiso 0.50 1 calc PR B -1 
C60 C 0.5862(7) 0.0238(5) 0.5398(4) 0.096(6) Uiso 0.50 1 d PG B -1 
H60 H 0.6261 0.0388 0.5634 0.115 Uiso 0.50 1 calc PR B -1 
C61 C 0.6208(5) -0.0022(5) 0.5000(4) 0.077(5) Uiso 0.50 1 d PG B -1 
H61 H 0.6848 -0.0058 0.4961 0.093 Uiso 0.50 1 calc PR B -1 
C62 C 0.5608(7) -0.0238(5) 0.4642(4) 0.063(4) Uiso 0.50 1 d PG B -1 
H62 H 0.5845 -0.0406 0.4360 0.076 Uiso 0.50 1 calc PR B -1 
 
loop_ 
 _atom_site_aniso_label 
 _atom_site_aniso_U_11 
 _atom_site_aniso_U_22 
 _atom_site_aniso_U_33 
 _atom_site_aniso_U_23 
 _atom_site_aniso_U_13 
 _atom_site_aniso_U_12 
Ge1 0.0293(13) 0.0219(13) 0.0290(8) -0.0017(8) -0.0012(8) -0.0038(7) 
Ge2 0.0185(8) 0.0319(12) 0.0356(8) 0.0018(8) -0.0012(6) -0.0001(7) 
Ge3 0.0243(9) 0.0274(11) 0.0318(7) -0.0008(8) -0.0017(6) -0.0014(7) 
Ge4 0.0356(14) 0.0160(12) 0.0357(9) 0.0004(8) 0.0028(9) -0.0033(8) 
Ge5 0.0197(6) 0.0204(6) 0.0342(6) -0.0062(5) -0.0047(5) 0.0025(4) 
C1 0.035(4) 0.049(4) 0.066(5) -0.009(3) -0.007(3) -0.004(3) 
C2 0.034(4) 0.043(4) 0.066(5) 0.007(3) -0.004(3) 0.002(3) 
C3 0.042(4) 0.042(4) 0.070(5) 0.003(3) 0.005(3) 0.001(3) 
C4 0.049(5) 0.061(5) 0.064(5) 0.007(4) 0.004(4) 0.002(4) 
C5 0.041(4) 0.057(5) 0.058(4) -0.004(4) 0.005(3) -0.003(3) 
C6 0.035(4) 0.045(4) 0.064(5) -0.006(3) -0.005(3) -0.002(3) 
C7 0.032(4) 0.038(4) 0.064(4) -0.003(3) 0.002(3) -0.005(3) 
C8 0.036(4) 0.046(4) 0.055(4) -0.007(3) 0.002(3) -0.004(3) 
C9 0.036(4) 0.050(4) 0.054(4) -0.003(3) 0.005(3) -0.001(3) 
C10 0.031(4) 0.054(4) 0.056(4) -0.003(3) 0.005(3) -0.004(3) 
C11 0.026(4) 0.063(5) 0.068(5) -0.007(4) -0.001(3) -0.006(3) 
C12 0.034(4) 0.049(4) 0.060(4) -0.005(3) 0.001(3) -0.004(3) 
C13 0.038(4) 0.030(4) 0.058(4) 0.005(3) 0.000(3) -0.003(3) 
C14 0.035(4) 0.047(4) 0.059(4) -0.004(3) -0.002(3) 0.000(3) 
C15 0.039(4) 0.054(5) 0.059(4) -0.007(4) -0.003(3) -0.003(3) 
C16 0.040(4) 0.050(4) 0.065(5) -0.001(4) -0.002(3) 0.006(3) 
C17 0.033(4) 0.061(5) 0.084(5) -0.017(4) 0.002(4) 0.005(3) 
C18 0.039(4) 0.053(5) 0.071(5) -0.006(4) 0.000(3) 0.003(3) 
C19 0.040(4) 0.072(6) 0.077(5) -0.014(4) -0.002(4) -0.005(4) 
C20 0.049(5) 0.065(5) 0.080(5) -0.019(4) -0.005(4) 0.017(4) 
C21 0.042(5) 0.087(6) 0.090(6) -0.031(5) -0.004(4) 0.005(4) 
C22 0.033(4) 0.052(4) 0.065(5) -0.013(4) -0.004(3) 0.000(3) 
C23 0.041(4) 0.075(6) 0.069(5) -0.014(4) 0.005(4) 0.008(4) 
C24 0.047(4) 0.054(5) 0.080(5) -0.013(4) -0.012(4) -0.005(4) 
C25 0.045(4) 0.030(4) 0.070(5) 0.005(3) 0.016(3) 0.005(3) 
C26 0.045(4) 0.032(4) 0.059(4) 0.008(3) 0.005(3) 0.001(3) 
C27 0.048(4) 0.040(4) 0.068(5) 0.001(3) 0.009(4) 0.009(3) 
C28 0.048(5) 0.047(5) 0.070(5) -0.005(4) -0.001(4) 0.004(3) 
C29 0.056(5) 0.034(4) 0.065(5) -0.006(3) 0.008(4) 0.003(3) 
C30 0.043(4) 0.038(4) 0.065(5) 0.004(3) 0.012(3) 0.000(3) 
C31 0.038(4) 0.036(4) 0.061(4) 0.000(3) -0.001(3) 0.000(3) 
C32 0.040(4) 0.038(4) 0.053(4) -0.001(3) 0.005(3) -0.001(3) 
C33 0.040(4) 0.039(4) 0.057(4) -0.006(3) 0.001(3) -0.002(3) 
C34 0.046(4) 0.039(4) 0.059(4) -0.010(3) -0.004(3) 0.003(3) 
C35 0.046(4) 0.036(4) 0.073(5) -0.003(3) -0.001(4) -0.001(3) 
C36 0.044(4) 0.035(4) 0.075(5) 0.003(3) 0.005(4) -0.002(3) 
C37 0.038(4) 0.038(4) 0.062(4) -0.008(3) 0.002(3) 0.002(3) 
C38 0.042(4) 0.038(4) 0.090(6) 0.003(4) 0.010(4) 0.008(3) 
C39 0.052(5) 0.037(4) 0.073(5) -0.007(4) 0.007(4) 0.005(3) 
C40 0.041(4) 0.047(5) 0.059(4) -0.003(3) 0.003(3) 0.009(3) 
C41 0.038(4) 0.044(4) 0.057(4) -0.004(3) 0.009(3) -0.002(3) 
C42 0.037(4) 0.042(4) 0.055(4) -0.003(3) 0.006(3) -0.004(3) 
C43 0.069(5) 0.038(4) 0.074(5) -0.002(4) 0.020(4) -0.005(4) 
C44 0.062(5) 0.054(5) 0.078(5) -0.011(4) 0.009(4) 0.011(4) 
C45 0.076(6) 0.039(5) 0.109(7) 0.008(4) 0.035(5) 0.003(4) 
C46 0.043(4) 0.042(4) 0.068(5) 0.001(3) 0.009(3) -0.004(3) 
C47 0.063(5) 0.048(5) 0.074(5) -0.007(4) 0.003(4) 0.010(4) 
C48 0.049(5) 0.042(4) 0.095(6) 0.017(4) 0.016(4) -0.002(3) 
C49 0.103(10) 0.213(16) 0.106(9) 0.016(10) 0.029(8) 0.044(10) 
C50 0.065(6) 0.078(7) 0.088(6) 0.017(5) -0.002(5) 0.004(5) 
C51 0.073(7) 0.092(8) 0.121(9) 0.022(7) 0.025(6) 0.005(6) 
C52 0.072(7) 0.097(8) 0.131(10) 0.011(8) 0.006(7) -0.005(6) 
C53 0.081(7) 0.090(8) 0.092(7) 0.000(6) 0.002(6) -0.028(6) 
C54 0.066(6) 0.104(9) 0.077(6) 0.002(6) -0.007(5) -0.020(6) 
C55 0.092(8) 0.082(7) 0.107(8) -0.003(6) -0.033(7) -0.007(6) 
 
_geom_special_details 
; 
 All esds (except the esd in the dihedral angle between two l.s. planes) 
 are estimated using the full covariance matrix.  The cell esds are taken 
 into account individually in the estimation of esds in distances, angles 
 and torsion angles; correlations between esds in cell parameters are only 
 used when they are defined by crystal symmetry.  An approximate (isotropic) 
 treatment of cell esds is used for estimating esds involving l.s. planes. 
; 
 
loop_ 
 _geom_bond_atom_site_label_1 
 _geom_bond_atom_site_label_2 
 _geom_bond_distance 
 _geom_bond_site_symmetry_2 
 _geom_bond_publ_flag 
Ge1 C1 2.052(8) . ? 
Ge1 Ge5 2.693(3) . ? 
Ge1 Ge4 2.7114(19) . ? 
Ge1 Ge2 2.718(3) . ? 
Ge2 C25 2.185(8) . ? 
Ge2 Ge3 2.735(2) . ? 
Ge3 C25 2.054(8) 2 ? 
Ge3 Ge5 2.699(2) . ? 
Ge3 Ge4 2.707(3) . ? 
Ge2 Ge5 3.388(2) . ?
Ge4 Ge5 3.396(2) . ?
Ge4 C1 2.185(8) 2 ? 
C1 C6 1.410(10) . ? 
C1 C2 1.424(10) . ? 
C1 Ge4 2.185(8) 2 ? 
C2 C3 1.400(10) . ? 
C2 C13 1.496(10) . ? 
C3 C4 1.384(10) . ? 
C3 H3 0.9500 . ? 
C4 C5 1.396(10) . ? 
C4 H4 0.9500 . ? 
C5 C6 1.384(10) . ? 
C5 H5 0.9500 . ? 
C6 C7 1.489(9) . ? 
C7 C8 1.402(9) . ? 
C7 C12 1.406(9) . ? 
C8 C9 1.396(9) . ? 
C8 C22 1.515(9) . ? 
C9 C10 1.364(9) . ? 
C9 H9 0.9500 . ? 
C10 C11 1.396(10) . ? 
C10 C23 1.517(10) . ? 
C11 C12 1.387(10) . ? 
C11 H11 0.9500 . ? 
C12 C24 1.500(10) . ? 
C13 C14 1.397(9) . ? 
C13 C18 1.409(9) . ? 
C14 C15 1.403(10) . ? 
C14 C19 1.495(10) . ? 
C15 C16 1.368(10) . ? 
C15 H15 0.9500 . ? 
C16 C17 1.368(10) . ? 
C16 C20 1.501(10) . ? 
C17 C18 1.409(10) . ? 
C17 H17 0.9500 . ? 
C18 C21 1.500(10) . ? 
C19 H19A 0.9800 . ? 
C19 H19B 0.9800 . ? 
C19 H19C 0.9800 . ? 
C20 H20A 0.9800 . ? 
C20 H20B 0.9800 . ? 
C20 H20C 0.9800 . ? 
C21 H21A 0.9800 . ? 
C21 H21B 0.9800 . ? 
C21 H21C 0.9800 . ? 
C22 H22A 0.9800 . ? 
C22 H22B 0.9800 . ? 
C22 H22C 0.9800 . ? 
C23 H23A 0.9800 . ? 
C23 H23B 0.9800 . ? 
C23 H23C 0.9800 . ? 
C24 H24A 0.9800 . ? 
C24 H24B 0.9800 . ? 
C24 H24C 0.9800 . ? 
C25 C30 1.406(10) . ? 
C25 C26 1.420(9) . ? 
C25 Ge3 2.054(8) 2 ? 
C26 C27 1.409(10) . ? 
C26 C37 1.482(9) . ? 
C27 C28 1.379(10) . ? 
C27 H27 0.9500 . ? 
C28 C29 1.368(10) . ? 
C28 H28 0.9500 . ? 
C29 C30 1.397(10) . ? 
C29 H29 0.9500 . ? 
C30 C31 1.519(9) . ? 
C31 C32 1.382(9) . ? 
C31 C36 1.401(9) . ? 
C32 C33 1.387(9) . ? 
C32 C46 1.509(9) . ? 
C33 C34 1.385(10) . ? 
C33 H33 0.9500 . ? 
C34 C35 1.391(10) . ? 
C34 C47 1.503(10) . ? 
C35 C36 1.391(10) . ? 
C35 H35 0.9500 . ? 
C36 C48 1.511(10) . ? 
C37 C42 1.406(9) . ? 
C37 C38 1.410(10) . ? 
C38 C39 1.380(10) . ? 
C38 C45 1.527(10) . ? 
C39 C40 1.384(10) . ? 
C39 H39 0.9500 . ? 
C40 C41 1.370(10) . ? 
C40 C44 1.497(10) . ? 
C41 C42 1.385(9) . ? 
C41 H41 0.9500 . ? 
C42 C43 1.491(10) . ? 
C43 H43A 0.9800 . ? 
C43 H43B 0.9800 . ? 
C43 H43C 0.9800 . ? 
C44 H44A 0.9800 . ? 
C44 H44B 0.9800 . ? 
C44 H44C 0.9800 . ? 
C45 H45A 0.9800 . ? 
C45 H45B 0.9800 . ? 
C45 H45C 0.9800 . ? 
C46 H46A 0.9800 . ? 
C46 H46B 0.9800 . ? 
C46 H46C 0.9800 . ? 
C47 H47A 0.9800 . ? 
C47 H47B 0.9800 . ? 
C47 H47C 0.9800 . ? 
C48 H48A 0.9800 . ? 
C48 H48B 0.9800 . ? 
C48 H48C 0.9800 . ? 
C49 C50 1.520(14) . ? 
C49 H49A 0.9800 . ? 
C49 H49B 0.9800 . ? 
C49 H49C 0.9800 . ? 
C50 C51 1.346(14) . ? 
C50 C55 1.418(14) . ? 
C51 C52 1.373(14) . ? 
C51 H51 0.9500 . ? 
C52 C53 1.355(14) . ? 
C52 H52 0.9500 . ? 
C53 C54 1.368(14) . ? 
C53 H53 0.9500 . ? 
C54 C55 1.414(15) . ? 
C54 H54 0.9500 . ? 
C55 H55A 0.9500 . ? 
C56 C57 1.5080 . ? 
C56 H56A 0.9800 . ? 
C56 H56B 0.9800 . ? 
C56 H56C 0.9800 . ? 
C57 C58 1.3468 . ? 
C57 C62 1.4177 . ? 
C58 C59 1.3911 . ? 
C58 H58 0.9500 . ? 
C59 C60 1.3621 . ? 
C59 H59 0.9500 . ? 
C60 C61 1.3671 . ? 
C60 H60 0.9500 . ? 
C61 C62 1.4258 . ? 
C61 H61 0.9500 . ? 
C62 H62 0.9500 . ? 
 
loop_ 
 _geom_angle_atom_site_label_1 
 _geom_angle_atom_site_label_2 
 _geom_angle_atom_site_label_3 
 _geom_angle 
 _geom_angle_site_symmetry_1 
 _geom_angle_site_symmetry_3 
 _geom_angle_publ_flag 
C1 Ge1 Ge5 148.0(2) . . ? 
C1 Ge1 Ge4 111.5(2) . . ? 
Ge5 Ge1 Ge4 77.87(8) . . ? 
C1 Ge1 Ge2 131.1(2) . . ? 
Ge5 Ge1 Ge2 77.53(8) . . ? 
Ge4 Ge1 Ge2 89.66(12) . . ? 
C25 Ge2 Ge1 121.1(2) . . ? 
C25 Ge2 Ge3 106.9(2) . . ? 
Ge1 Ge2 Ge3 80.99(9) . . ? 
C25 Ge3 Ge5 145.9(2) 2 . ? 
C25 Ge3 Ge4 131.2(2) 2 . ? 
Ge5 Ge3 Ge4 77.86(7) . . ? 
C25 Ge3 Ge2 114.9(2) 2 . ? 
Ge5 Ge3 Ge2 77.14(6) . . ? 
Ge4 Ge3 Ge2 89.39(10) . . ? 
C1 Ge4 Ge3 123.8(2) 2 . ? 
C1 Ge4 Ge1 107.6(2) 2 . ? 
Ge3 Ge4 Ge1 81.62(12) . . ? 
Ge1 Ge5 Ge3 82.09(7) . . ? 
C6 C1 C2 118.2(7) . . ? 
C6 C1 Ge1 125.3(5) . . ? 
C2 C1 Ge1 115.8(5) . . ? 
C6 C1 Ge4 111.0(5) . 2 ? 
C2 C1 Ge4 130.6(5) . 2 ? 
C3 C2 C1 119.7(7) . . ? 
C3 C2 C13 114.5(6) . . ? 
C1 C2 C13 125.6(6) . . ? 
C4 C3 C2 121.3(7) . . ? 
C4 C3 H3 119.3 . . ? 
C2 C3 H3 119.3 . . ? 
C3 C4 C5 118.7(7) . . ? 
C3 C4 H4 120.7 . . ? 
C5 C4 H4 120.7 . . ? 
C6 C5 C4 121.6(7) . . ? 
C6 C5 H5 119.2 . . ? 
C4 C5 H5 119.2 . . ? 
C5 C6 C1 120.3(6) . . ? 
C5 C6 C7 113.8(6) . . ? 
C1 C6 C7 125.6(7) . . ? 
C8 C7 C12 118.4(6) . . ? 
C8 C7 C6 121.7(6) . . ? 
C12 C7 C6 118.7(6) . . ? 
C9 C8 C7 120.0(6) . . ? 
C9 C8 C22 120.2(6) . . ? 
C7 C8 C22 119.8(6) . . ? 
C10 C9 C8 122.0(7) . . ? 
C10 C9 H9 119.0 . . ? 
C8 C9 H9 119.0 . . ? 
C9 C10 C11 118.0(6) . . ? 
C9 C10 C23 121.6(7) . . ? 
C11 C10 C23 120.4(6) . . ? 
C12 C11 C10 121.8(6) . . ? 
C12 C11 H11 119.1 . . ? 
C10 C11 H11 119.1 . . ? 
C11 C12 C7 119.8(6) . . ? 
C11 C12 C24 120.2(6) . . ? 
C7 C12 C24 119.9(6) . . ? 
C14 C13 C18 119.7(7) . . ? 
C14 C13 C2 119.2(6) . . ? 
C18 C13 C2 119.9(6) . . ? 
C13 C14 C15 118.7(6) . . ? 
C13 C14 C19 120.7(6) . . ? 
C15 C14 C19 120.5(6) . . ? 
C16 C15 C14 122.6(7) . . ? 
C16 C15 H15 118.7 . . ? 
C14 C15 H15 118.7 . . ? 
C15 C16 C17 118.1(7) . . ? 
C15 C16 C20 121.8(7) . . ? 
C17 C16 C20 120.0(7) . . ? 
C16 C17 C18 122.5(7) . . ? 
C16 C17 H17 118.7 . . ? 
C18 C17 H17 118.7 . . ? 
C17 C18 C13 118.2(7) . . ? 
C17 C18 C21 120.1(7) . . ? 
C13 C18 C21 121.8(7) . . ? 
C14 C19 H19A 109.5 . . ? 
C14 C19 H19B 109.5 . . ? 
H19A C19 H19B 109.5 . . ? 
C14 C19 H19C 109.5 . . ? 
H19A C19 H19C 109.5 . . ? 
H19B C19 H19C 109.5 . . ? 
C16 C20 H20A 109.5 . . ? 
C16 C20 H20B 109.5 . . ? 
H20A C20 H20B 109.5 . . ? 
C16 C20 H20C 109.5 . . ? 
H20A C20 H20C 109.5 . . ? 
H20B C20 H20C 109.5 . . ? 
C18 C21 H21A 109.5 . . ? 
C18 C21 H21B 109.5 . . ? 
H21A C21 H21B 109.5 . . ? 
C18 C21 H21C 109.5 . . ? 
H21A C21 H21C 109.5 . . ? 
H21B C21 H21C 109.5 . . ? 
C8 C22 H22A 109.5 . . ? 
C8 C22 H22B 109.5 . . ? 
H22A C22 H22B 109.5 . . ? 
C8 C22 H22C 109.5 . . ? 
H22A C22 H22C 109.5 . . ? 
H22B C22 H22C 109.5 . . ? 
C10 C23 H23A 109.5 . . ? 
C10 C23 H23B 109.5 . . ? 
H23A C23 H23B 109.5 . . ? 
C10 C23 H23C 109.5 . . ? 
H23A C23 H23C 109.5 . . ? 
H23B C23 H23C 109.5 . . ? 
C12 C24 H24A 109.5 . . ? 
C12 C24 H24B 109.5 . . ? 
H24A C24 H24B 109.5 . . ? 
C12 C24 H24C 109.5 . . ? 
H24A C24 H24C 109.5 . . ? 
H24B C24 H24C 109.5 . . ? 
C30 C25 C26 118.0(7) . . ? 
C30 C25 Ge3 125.0(5) . 2 ? 
C26 C25 Ge3 116.0(5) . 2 ? 
C30 C25 Ge2 109.2(5) . . ? 
C26 C25 Ge2 132.7(5) . . ? 
Ge3 C25 Ge2 17.70(8) 2 . ? 
C27 C26 C25 118.8(6) . . ? 
C27 C26 C37 113.7(6) . . ? 
C25 C26 C37 127.2(6) . . ? 
C28 C27 C26 122.5(7) . . ? 
C28 C27 H27 118.8 . . ? 
C26 C27 H27 118.8 . . ? 
C29 C28 C27 118.1(7) . . ? 
C29 C28 H28 120.9 . . ? 
C27 C28 H28 120.9 . . ? 
C28 C29 C30 122.0(7) . . ? 
C28 C29 H29 119.0 . . ? 
C30 C29 H29 119.0 . . ? 
C29 C30 C25 120.4(6) . . ? 
C29 C30 C31 113.4(6) . . ? 
C25 C30 C31 125.9(7) . . ? 
C32 C31 C36 119.7(6) . . ? 
C32 C31 C30 121.9(6) . . ? 
C36 C31 C30 117.3(6) . . ? 
C31 C32 C33 119.7(6) . . ? 
C31 C32 C46 120.8(6) . . ? 
C33 C32 C46 119.5(6) . . ? 
C34 C33 C32 121.8(6) . . ? 
C34 C33 H33 119.1 . . ? 
C32 C33 H33 119.1 . . ? 
C33 C34 C35 118.0(6) . . ? 
C33 C34 C47 121.4(7) . . ? 
C35 C34 C47 120.6(7) . . ? 
C34 C35 C36 121.4(7) . . ? 
C34 C35 H35 119.3 . . ? 
C36 C35 H35 119.3 . . ? 
C35 C36 C31 119.4(7) . . ? 
C35 C36 C48 118.7(6) . . ? 
C31 C36 C48 121.9(6) . . ? 
C42 C37 C38 118.6(6) . . ? 
C42 C37 C26 119.3(6) . . ? 
C38 C37 C26 121.5(6) . . ? 
C39 C38 C37 119.9(7) . . ? 
C39 C38 C45 119.6(7) . . ? 
C37 C38 C45 120.4(7) . . ? 
C38 C39 C40 121.9(7) . . ? 
C38 C39 H39 119.1 . . ? 
C40 C39 H39 119.1 . . ? 
C41 C40 C39 117.5(7) . . ? 
C41 C40 C44 122.4(7) . . ? 
C39 C40 C44 120.1(7) . . ? 
C40 C41 C42 123.4(7) . . ? 
C40 C41 H41 118.3 . . ? 
C42 C41 H41 118.3 . . ? 
C41 C42 C37 118.7(6) . . ? 
C41 C42 C43 120.6(6) . . ? 
C37 C42 C43 120.6(6) . . ? 
C42 C43 H43A 109.5 . . ? 
C42 C43 H43B 109.5 . . ? 
H43A C43 H43B 109.5 . . ? 
C42 C43 H43C 109.5 . . ? 
H43A C43 H43C 109.5 . . ? 
H43B C43 H43C 109.5 . . ? 
C40 C44 H44A 109.5 . . ? 
C40 C44 H44B 109.5 . . ? 
H44A C44 H44B 109.5 . . ? 
C40 C44 H44C 109.5 . . ? 
H44A C44 H44C 109.5 . . ? 
H44B C44 H44C 109.5 . . ? 
C38 C45 H45A 109.5 . . ? 
C38 C45 H45B 109.5 . . ? 
H45A C45 H45B 109.5 . . ? 
C38 C45 H45C 109.5 . . ? 
H45A C45 H45C 109.5 . . ? 
H45B C45 H45C 109.5 . . ? 
C32 C46 H46A 109.5 . . ? 
C32 C46 H46B 109.5 . . ? 
H46A C46 H46B 109.5 . . ? 
C32 C46 H46C 109.5 . . ? 
H46A C46 H46C 109.5 . . ? 
H46B C46 H46C 109.5 . . ? 
C34 C47 H47A 109.5 . . ? 
C34 C47 H47B 109.5 . . ? 
H47A C47 H47B 109.5 . . ? 
C34 C47 H47C 109.5 . . ? 
H47A C47 H47C 109.5 . . ? 
H47B C47 H47C 109.5 . . ? 
C36 C48 H48A 109.5 . . ? 
C36 C48 H48B 109.5 . . ? 
H48A C48 H48B 109.5 . . ? 
C36 C48 H48C 109.5 . . ? 
H48A C48 H48C 109.5 . . ? 
H48B C48 H48C 109.5 . . ? 
C50 C49 H49A 109.5 . . ? 
C50 C49 H49B 109.5 . . ? 
H49A C49 H49B 109.5 . . ? 
C50 C49 H49C 109.5 . . ? 
H49A C49 H49C 109.5 . . ? 
H49B C49 H49C 109.5 . . ? 
C51 C50 C55 117.8(10) . . ? 
C51 C50 C49 119.5(10) . . ? 
C55 C50 C49 122.6(10) . . ? 
C50 C51 C52 122.2(11) . . ? 
C50 C51 H51 118.9 . . ? 
C52 C51 H51 118.9 . . ? 
C53 C52 C51 121.4(11) . . ? 
C53 C52 H52 119.3 . . ? 
C51 C52 H52 119.3 . . ? 
C52 C53 C54 119.1(11) . . ? 
C52 C53 H53 120.4 . . ? 
C54 C53 H53 120.4 . . ? 
C53 C54 C55 120.3(10) . . ? 
C53 C54 H54 119.8 . . ? 
C55 C54 H54 119.8 . . ? 
C54 C55 C50 119.2(10) . . ? 
C54 C55 H55A 120.4 . . ? 
C50 C55 H55A 120.4 . . ? 
C57 C56 H56A 109.5 . . ? 
C57 C56 H56B 109.5 . . ? 
H56A C56 H56B 109.5 . . ? 
C57 C56 H56C 109.5 . . ? 
H56A C56 H56C 109.5 . . ? 
H56B C56 H56C 109.5 . . ? 
C58 C57 C62 118.3 . . ? 
C58 C57 C56 118.9 . . ? 
C62 C57 C56 122.9 . . ? 
C57 C58 C59 121.9 . . ? 
C57 C58 H58 119.1 . . ? 
C59 C58 H58 119.1 . . ? 
C60 C59 C58 121.0 . . ? 
C60 C59 H59 119.5 . . ? 
C58 C59 H59 119.5 . . ? 
C59 C60 C61 119.5 . . ? 
C59 C60 H60 120.2 . . ? 
C61 C60 H60 120.2 . . ? 
C60 C61 C62 120.1 . . ? 
C60 C61 H61 120.0 . . ? 
C62 C61 H61 120.0 . . ? 
C57 C62 C61 119.2 . . ? 
C57 C62 H62 120.4 . . ? 
C61 C62 H62 120.4 . . ? 
 
_diffrn_measured_fraction_theta_max    0.981 
_diffrn_reflns_theta_full              25.25 
_diffrn_measured_fraction_theta_full   0.981 
_refine_diff_density_max    0.910 
_refine_diff_density_min   -0.766 
_refine_diff_density_rms    0.106 
